# Supplementary material for: All-cause and cause-specific mortality in psoriasis patients: a systematic review and meta-analysis
Source: Frontiers journal article supplement (doi:10.3389/fimmu.2025.1610499), 2025-07-24
Supplement: Data_Sheet_1.docx [file Data_Sheet_1.docx]

**Supplementary Material Figures**

Supplementary Material Figure 1. Sensitivity analysis for the risk of all-cause mortality in psoriasis

Supplementary Material Figure 2. Sensitivity analysis for the risk of cardiovascular mortality in psoriasis

Supplementary Material Figure. 3 Sensitivity analysis for the risk of infection mortality in psoriasis

Supplementary Material Figure 4. Sensitivity analysis for the risk of neoplasm mortality in psoriasis

Supplementary Material Figure 5. Sensitivity analysis for the risk of suicide mortality in psoriasis
